# Supplementary material for: Molecular cloning, sequence analysis and functional characterization of the genecluster for biosynthesis of K-252a and its analogs
Source: Royal Society of Chemistry journal article supplement (doi:10.1039/b905293c), 2009-08-04
Supplement: b905293c.pdf [file b905293c.pdf]

## Supplementary Information

### Molecular Cloning, Sequence Analysis and Functional Characterization of the Gene Cluster for Biosyntheses of K-252a and Its Analogs

Hsien-Tai Chiu,\* Yi-Lin Chen, Chien-Yu Chen, Chyn Jin, Meng-Na Lee, and  
Yu-Chin Lin

*Department of Biological Science and Technology,  
National Chiao Tung University, 75 Po-Ai Street,  
Hsinchu 300, Taiwan.*

#### CONTENTS

##### Experimental Procedures

**Figure S1** Degenerate PCR Amplification on *Nocardiosis sp.* K-252 gDNA

**Table S1** Summary of the Discrepancies between *nok* and *ink* Genetic  
Loci

**Table S2** Sequences of Degenerate and Specific Primers for Fosmid Library  
Screening

**Table S3** Sequences of Primers used for Gene Cloning by PCR

**Figure S2** The 2D-NMR Spectra of Chromopyrrolic Acid

##### References

---

\*To whom correspondence should be addressed at the Department of Biological  
Science and Technology, National Chiao Tung University, 75 Po-Ai Street, Hsinchu  
300, Taiwan.

Tel: +886-3-5131595; Fax: +886-3-5719605; E-mail: Chiu@mail.nctu.edu.tw.

## Experimental Procedures (Supplementary)

### Construction of expression plasmids for His-tagged NokA, NokB, NokC and NokD proteins

The *nokA*, *nokB*, *nokC* and *nokD* genes were amplified from the pJC3B5 fosmid clone as a template by polymerase chain reaction (PCR) amplifications with corresponding primers (Table S3) which introduced unique restriction sites at the 5' and 3' ends as follows. For *nokA* amplification, the primer pair, NKONF1 and NKONhR1, with the restriction sites *NdeI* and *NheI*, respectively, was used. NKDNF1 and NKDXR1 introduced with *NdeI* and *XhoI* sites, respectively, were used to amplify *nokB*. Similarly, *nokC* and *nokD* were amplified with corresponding 5' and 3' primers introduced with *NdeI* and *EcoRI* sites, where NKPNdF1 and NKPEcR1, respectively, were used for *nokC* amplification, NKCNdF1 and NKCEcR1, respectively, for *nokD* amplification. The reaction mixture containing 100 ng of DNA template, 5  $\mu$ M of each primer and 0.3 mM of each dNTP was subsequently added with 1.25 units of *pfu* (Stratagen) to trigger the PCR reaction performed in a thermocycler (PTC-200 DNA Engine, MJ Research, USA). The PCR-amplified fragment of *nokA* was then cloned into an *NdeI*- and *NheI*-digested pET28a expression vector, that of *nokB* into an *NdeI*- and *XhoI*-digested pET21b expression vector, and those of *nokC* and *nokD* into an *NdeI*- and *EcoRI*-digested pET21b expression vector with corresponding sites, generating the N-terminal His-tag expression plasmid pJZ38 and the C-terminal His-tag expression plasmids pJZ18, pCY11 and pCY6, respectively.

### Heterologous expression of His-tagged NokA, NokB, NokC and NokD proteins

Each DNA construct containing the coding gene with poly-His codons was individually transformed into *E. coli* BL21 (DE3) (Stratagen) for protein overexpression. To improve NokA solubility, a co-expression of N-terminal His<sub>6</sub>-tagged NokA with the chaperone team encoded by pG-KJE7 was conducted. For protein production, the *E. coli* transformant was cultured at 37°C in Luria-Bertani medium with 100  $\mu$ g/ml ampicillin and 30  $\mu$ g/ml kanamycin until OD<sub>600</sub> reached 0.4-0.5. Subsequently, the co-expression was induced with 250 $\mu$ M isopropyl  $\beta$ -D-1-thiogalactopyranoside (IPTG) and 0.2% (w/v) L-arabinose at 25°C for 10 h. For expression of C-terminal His<sub>6</sub>-tagged NokB, the *E. coli* culture was incubated at 37°C with 100  $\mu$ g/ml ampicillin, and was subsequently induced with 250  $\mu$ M IPTG for overexpression at 15°C for 24 h. For C-terminal His<sub>6</sub>-tagged NokC expression, the *E. coli* culture was grown at 37°C with 100  $\mu$ g/ml ampicillin until OD<sub>600</sub> of 0.3-0.4 reached, and was then induced with 50  $\mu$ M IPTG at 30°C for 4 h. To express C-terminal His<sub>6</sub>-tagged NokD, the *E. coli* transformant was grown at 37°C with 100

$\mu$ g/ml ampicillin to reach OD<sub>600</sub> of 0.4, at which point IPTG was added to give a final concentration of 50  $\mu$ M. The induced culture was allowed to grow at 15°C for 10 h.

### **Determination of the optimal co-expression condition for NokABCD**

To probe the optimal co-expression condition for NokABCD and chaperone proteins, each of NokA, NokB, NokC and NokD was first examined for its own expression condition to obtain purified His-tagged protein as a molecular standard. Based on each of the four conditions, a selected co-expression condition was then applied to each individual to re-examine the solubility and production yield of each protein when expressed in the presence of the chaperones. After several cycles of the selection process, the final co-expression condition with the chaperones, as described in **Materials and methods**, was determined to be the induction with 250  $\mu$ M IPTG and 0.2% (w/v) L-arabinose at 25°C for 10 h for the co-expression construct coding for NokABCD.

### **Purification of each of His-tagged NokA, NokB, NokC and NokD proteins**

For His-tagged NokA purification, the cells were collected by centrifugation (1,902g, 45 min) at 4°C and were resuspended in buffer A (20 mM Tris-HCl, 200mM NaCl, 10% (v/v) glycerol, pH 7.8). Subsequently, the cells were broken and disrupted by French Press (two passages at 16,000 psi, Spectronic Instruments). After centrifugation at 30,000g at 4°C for 1 h, the supernatant was subjected to purification by a Ni-NTA column (Qiagen) pre-equilibrated with buffer A at a flow rate of 1 ml/min and monitored at 254 nm. The His-tagged NokA was eluted with a linear gradient of 0-500 mM imidazole, constituted with buffer A and buffer B (20 mM Tris-HCl, 200 mM NaCl, 500 mM imidazole, 10% (v/v) glycerol, pH 7.8). For His-tagged NokB purification, the procedure similarly as described for NokA was used, where buffer A was replaced by buffer C (20 mM Tris-HCl, 10% (v/v) glycerol, pH 8.5) and buffer B by buffer D (20 mM Tris-HCl, 10% (v/v) glycerol, 500mM imidazole, pH 8.5). For His-tagged NokC purification, buffer E (25 mM Tris-HCl, 500 mM NaCl, 15% (v/v) glycerol, pH 7.6) and buffer F (25 mM Tris-HCl, 500 mM NaCl, 15% (v/v) glycerol, 500 mM imidazole, pH 7.6) were used to replace buffer A and buffer B, respectively. For His-tagged NokD, buffer G (20 mM Tris-HCl, 500 mM NaCl with 10% (v/v) glycerol at pH 7.8) and buffer H (buffer G plus 500 mM imidazole) were applied to replace buffer A and buffer B, respectively. The purified His-tagged recombinant proteins were subjected to 12.5% SDS-PAGE analysis.

(Supplementary Figures, Schemes and Tables)

**Figure S1 Degenerate PCR Amplification on *Nocardiosis sp.* K-252 gDNA**

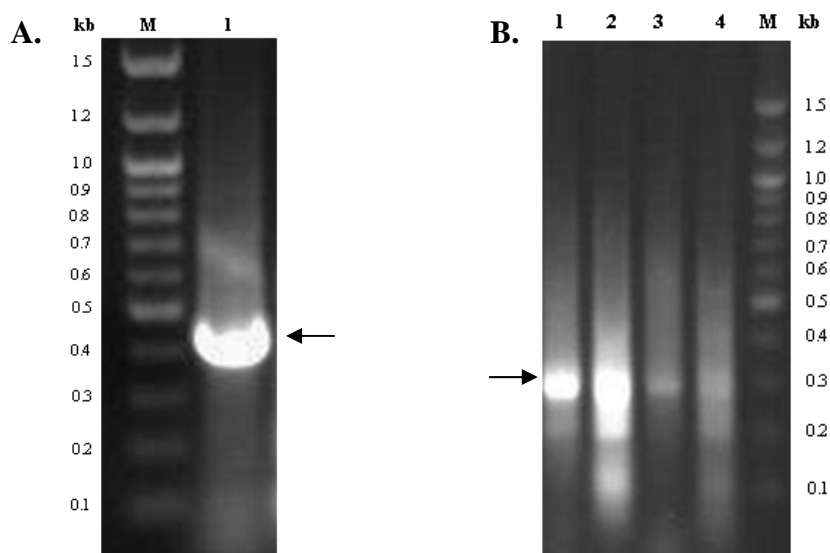

(A) The oligonucleotide primers of P1 and P2 pairs were used to amplify the 480bp nucleotide fragment. The 100bp DNA ladder was used as a marker as indicated (M) in figure. (B) The oligonucleotide primers of AG4 and AG5 pairs were utilized to amplify the 300bp nucleotide fragment using the genomic DNA as a template. The agarose gel was indicated as follows: Lane 1: 10% DMSO, Lane 2: without DMSO, Lane 3: zNTP with 10% DMSO, Lane 4: zNTP without DMSO. (zNTP is a mixture of dATP, dCTP, dTTP, dGTP and 7-deazaGTP).

**Table S1 Summary<sup>a</sup> of the Discrepancies between *nok* and *ink*<sup>b</sup> Genetic Loci**

|                                                                                                                                                                                                                                                                                                                                                                                                                                                                                                                                                                                                                                                                                                                                                                                                                              |
|------------------------------------------------------------------------------------------------------------------------------------------------------------------------------------------------------------------------------------------------------------------------------------------------------------------------------------------------------------------------------------------------------------------------------------------------------------------------------------------------------------------------------------------------------------------------------------------------------------------------------------------------------------------------------------------------------------------------------------------------------------------------------------------------------------------------------|
| <p><b>ORF1~ORF7<sup>c</sup>:</b> The <i>ink</i> locus lacks the sequence region (8810 bp) of <i>nok orfs1~7</i>. Organization of <i>orfs</i> in this region was completely different between <i>nok</i> and <i>ink</i>, and many of them were different in orientation, function or size.</p>                                                                                                                                                                                                                                                                                                                                                                                                                                                                                                                                |
| <p><b>ORF8:</b> Predicted size of InkT (294 a.a.)<sup>b</sup> was different from that of <i>nok</i> ORF8 (277 a.a.).</p>                                                                                                                                                                                                                                                                                                                                                                                                                                                                                                                                                                                                                                                                                                     |
| <p><b>ORF11 and ORF12:</b> The sequences corresponding to <i>orf11</i> and <i>orf12</i> were not annotated in <i>ink</i>.</p>                                                                                                                                                                                                                                                                                                                                                                                                                                                                                                                                                                                                                                                                                                |
| <p><b>ORF14:</b> Predicted size of InkB (304 a.a. in NCBI)<sup>b</sup> was different from that of <i>nok</i> ORF14 (NokG, 309 a.a.). The size of InkB was reported to be 309 a.a. in <i>ink</i> paper.<sup>b</sup></p>                                                                                                                                                                                                                                                                                                                                                                                                                                                                                                                                                                                                       |
| <p><b>ORF15:</b> In <i>ink</i> locus, the 226 bp in the 5'-end sequence of <i>inkA</i> was a 5'-end fragment of <i>nok orf17</i> (<i>nokP</i>), where <i>inkA</i> coded for glucose-1-phosphate thymidyltransferase and <i>nokP</i> coded for cytochrome P450 hydroxylase. Thus, <i>inkA</i> is a gene composed of two partial fragments, one from <i>orf15</i> (<i>nokF</i>) and the other from <i>orf17</i> (<i>nokP</i>). And, the joint site of the two fragments was found to be a <i>Sau3AI</i> in DNA sequence.<sup>d</sup> Predicted size of InkA (369 a.a.)<sup>b</sup> was different from that of <i>nok</i> ORF15 (NokF, 354 a.a.).</p>                                                                                                                                                                           |
| <p><b>ORF16 and ORF17:</b> A 2049 bp (<i>ca.</i> 2 kb) segment of DNA sequence harboring <i>nok orf16</i> (<i>nokK</i>) and <i>orf17</i> (<i>nokP</i>) was not found in <i>ink</i> gene cluster sequence and genetic locus (see Fig. 3 of the paper). Both <i>nokK</i> and <i>nokP</i> were proposed to play important roles in K-252a biosynthesis.</p>                                                                                                                                                                                                                                                                                                                                                                                                                                                                     |
| <p><b>ORF19:</b> Predicted size of InkY (171 a.a., named InkC in Kim's paper)<sup>b</sup> is shorter than that of <i>nok</i> ORF19 (NokJ, 398 a.a.). NokJ was proposed to be a key enzyme to catalyze the oxidative C-N bond formation, and its homolog (StaN, 394 a.a.) in staurosporine biosynthesis has been functionally characterized <i>in vivo</i>.<sup>1</sup></p>                                                                                                                                                                                                                                                                                                                                                                                                                                                   |
| <p><b>ORF20:</b> The predicted product of <i>inkG</i> is 53 amino acids shorter at its N-terminal as compared to <i>nok orf20</i> coding for NokL (436 a.a.). The 53-amino acid region in InkG (383 a.a., written 419 a.a. in <i>ink</i> paper)<sup>b</sup> contains a conserved His-14, an equivalent of which has been proposed to be a catalytic base in some O-Gtfs.</p>                                                                                                                                                                                                                                                                                                                                                                                                                                                 |
| <p><b>ORF24:</b> The <i>inkP</i> gene lacks 807 bp at its 3'-end in sequence, leading to a truncated product (423 bp) fused with a small fragment (105 bp) of miscellaneous sequence. The resulting fused protein of InkP (175 a.a.) was shorter than <i>nok</i> ORF24 (NokC, 409 a.a.). Homologs of NokC in rebeccamycin (RebP, 397 a.a) and staurosporine (StaP, 417 a.a.) biosyntheses have been functionally proven to be cytochrome p450 enzymes <i>in vitro</i>. NokC highly resembled both RebP and StaP in sequence. A <i>Sau3AI</i> was found at the truncation/fusion site (near the 3'-end) of <i>inkP</i>, and the remaining <i>ink</i> gene cluster sequence (2815 bp out of 20300 bp) downstream of the truncation site (<i>Sau3AI</i> in <i>inkP</i>), was totally different from <i>nok</i>.<sup>d</sup></p> |
| <p><b>ORF25~ORF35:</b> The <i>ink</i> locus lacks the DNA sequence (15610 bp) of the region harboring <i>nok orfs25~35</i>. Moreover, the arrangement of the <i>inkU</i> and <i>orfs22~32</i> in <i>ink</i> locus, corresponding to the region, was completely different from that of <i>nok orfs25~35</i>. Notably, <i>orf25</i> (<i>nokE</i>), <i>orf 26</i> (<i>nokS</i>) and <i>orf27</i> (<i>nokT</i>) in <i>nok</i> genetic locus coded for the proteins critical in transcription activation and two-component system regulation of K-252a biosynthesis.</p>                                                                                                                                                                                                                                                          |

a. see also Fig. 3 (of our paper) for the comparison between *nok* locus and *ink* locus.

b. the protein sizes (a.a.) of many *orfs* in *ink* paper<sup>2</sup> were in disagreement with those submitted to GenBank (DQ399653). In this table, the sizes reported by Kim *et al.* in GenBank were used; this however does not change the general features of the discrepancies if otherwise.

c. the *orf* number designated in *nok* genetic locus, as shown in Table 1 (of our paper).

d. Kim's genomic library was constructed by partial *Sau3AI* digestion of chromosomal DNA (see reference S2).

**Table S2 Sequences of Degenerate and Specific Primers for Fosmid Library Screening**

| Primer Name    | Primer sequence (5'→3' direction)  | Target Gene Function                     |
|----------------|------------------------------------|------------------------------------------|
| AG4 (forward)  | RYG TCS GTG ATC TCS AGC TCG CCS CG | NDP-glucose synthase <sup>3</sup>        |
| AG5 (reverse)  | GAC TTC RTS ATG TAT CTS GGC GAC AA | NDP-glucose synthase <sup>3</sup>        |
| P1 (forward)   | CSG GSG SSG CSG GST TCA TSG G      | NDP-glucose 4,6-dehydratase <sup>4</sup> |
| P2 (reverse)   | GGG WRC TGG YRS GGS CCG TAG TTG    | NDP-glucose 4,6-dehydratase <sup>4</sup> |
| syn (forward)  | ACT TCG TCA TGT ATC TCG GCG ACA AC | NDP-glucose synthase                     |
| syn (reverse)  | GTG AAC AGG TAG ACG CCG ACC AGC CG | NDP-glucose synthase                     |
| dehy (forward) | GTA GTT GTT GCC GCA CCG GGT GAT C  | NDP-glucose 4,6-dehydratase              |
| dehy (reverse) | GAG GTG ACC GTG CTC GAC AAG CTC AC | NDP-glucose 4,6-dehydratase              |

**Table S3 Sequences of Primers used for Gene Cloning by PCR**

| Primer Name       | Primer sequence (5'→3' direction) | Restriction site | Gene        |
|-------------------|-----------------------------------|------------------|-------------|
| NKONF1 (forward)  | <u>CATATG</u> TTCAGTCGTCTACC      | <i>Nde</i> I     | <i>nokA</i> |
| NKONhR1 (reverse) | <u>GCTAGCT</u> CATCGGCCAGATC      | <i>Nhe</i> I     | <i>nokA</i> |
| NKDNF1 (forward)  | <u>CATATG</u> AGCGTCTTCAGCCTGC    | <i>Nde</i> I     | <i>nokB</i> |
| NKD XR1 (reverse) | <u>CTCGAGT</u> CTCACGTTCCCC       | <i>Xho</i> I     | <i>nokB</i> |
| NKDNhR1 (reverse) | <u>GCTAGCT</u> CATCTCACGCTTC      | <i>Nhe</i> I     | <i>nokB</i> |
| NKPNdF1 (forward) | <u>CATATG</u> GAGCCGTTCTCCCC      | <i>Nde</i> I     | <i>nokC</i> |
| NKPEcR1 (reverse) | <u>GAATTC</u> CCTCGCGGGTGG        | <i>Eco</i> RI    | <i>nokC</i> |
| NKPNhR1 (reverse) | <u>GCTAGCT</u> CACCTCGCGGG        | <i>Nhe</i> I     | <i>nokC</i> |
| NKCNdF1 (forward) | <u>CATATG</u> ACTCGCAGCGAAG       | <i>Nde</i> I     | <i>nokD</i> |
| NKCEcR1 (reverse) | <u>GAATTC</u> CCCCGCCCCTCGCAC     | <i>Eco</i> RI    | <i>nokD</i> |
| NKCNhR1 (reverse) | <u>GCTAGCT</u> CACCCCGCCCCTC      | <i>Nhe</i> I     | <i>nokD</i> |

restriction sites are underlined in sequence.

**Figure S2 The 2D-NMR Spectra of Chromopyrrolic Acid (CPA, 3)**

**Figure S2a The gCOSY Spectrum of CPA (3)**

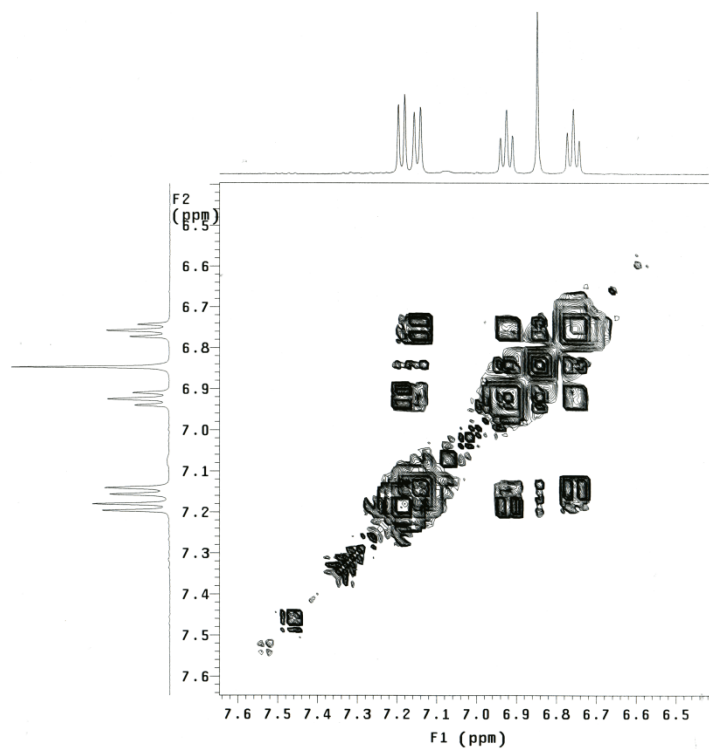

**Figure S2b The gHMQC Spectrum of CPA (3)**

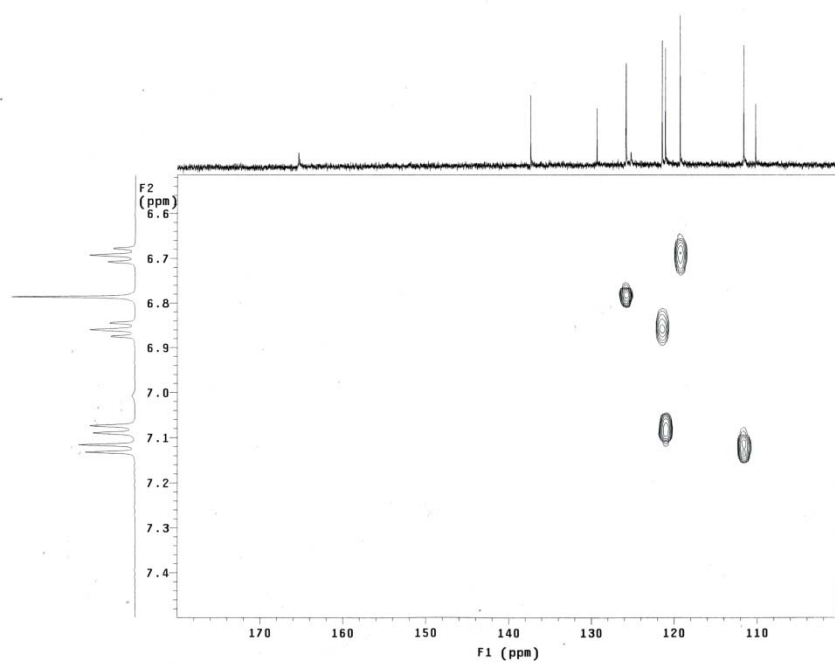

## References (Supplementary Information)

- S1. H. Onaka, S. Asamizu, Y. Igarashi, R. Yoshida and T. Furumai, *Biosci. Biotechnol. Biochem.*, 2005, **69**, 1753-1759.
- S2. S. Y. Kim, J. S. Park, C. S. Chae, C. G. Hyun, B. W. Choi, J. Shin and K. B. Oh, *Appl. Microbiol. Biotechnol.*, 2007, **75**, 1119-1126.
- S3. C. Hyun, S. S. Kim, J.K. Sohng, J. Hahn, J. Kim and J. Suh., *FEMS Microbiol. Lett.*, 2000, **183**, 183-189.
- S4. H. Decker, S. Gaisser, S. Pelzer, P. Schneider, L. Westrich, W. Wohlleben and A. Bechthold, *FEMS Microbiol. Lett.*, 1996, **141**, 195-201.
